# Supplementary material
Source: PubMed Central journal article supplement (PMC9927375)

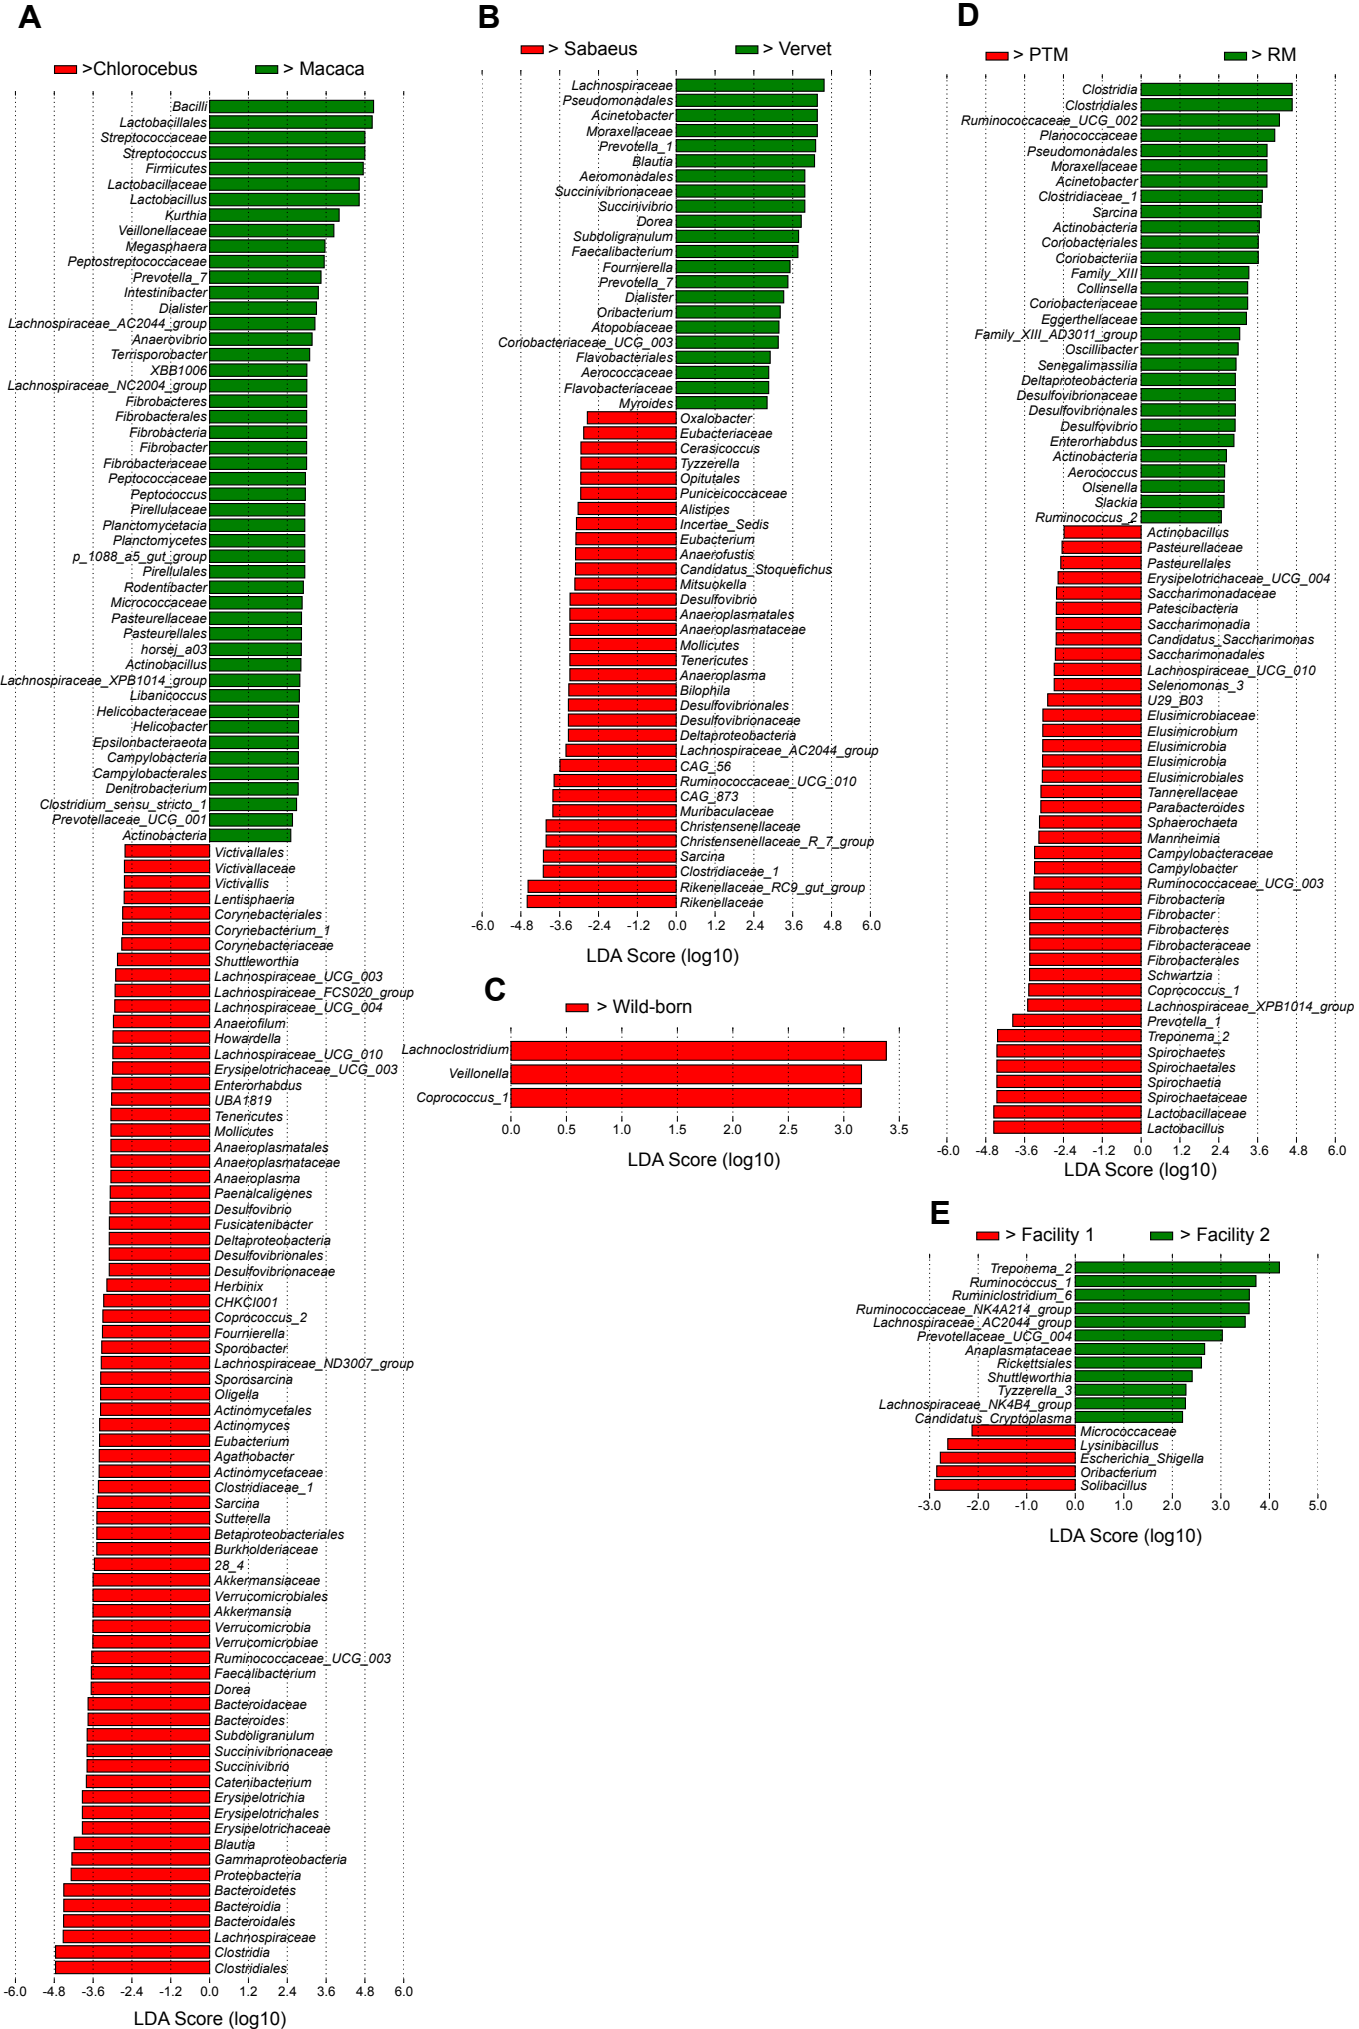

Supplement: spectrum.02139-22-s0003.pdf [file spectrum.02139-22-s0003.pdf]
